# Supplementary material for: Determinants of LV dP/dtmax and QRS duration with different fusion strategies in cardiac resynchronisation therapy
Source: HighWire-hosted journal article supplement (doi:10.1136/openhrt-2021-001615), 2021-05-01

Scatterplot showing the relationship between mean maximum LV pressure derivative and the atrial to LV paced interval with all different modes of biventricular pacing pooled (FUSION and NO FUSION)

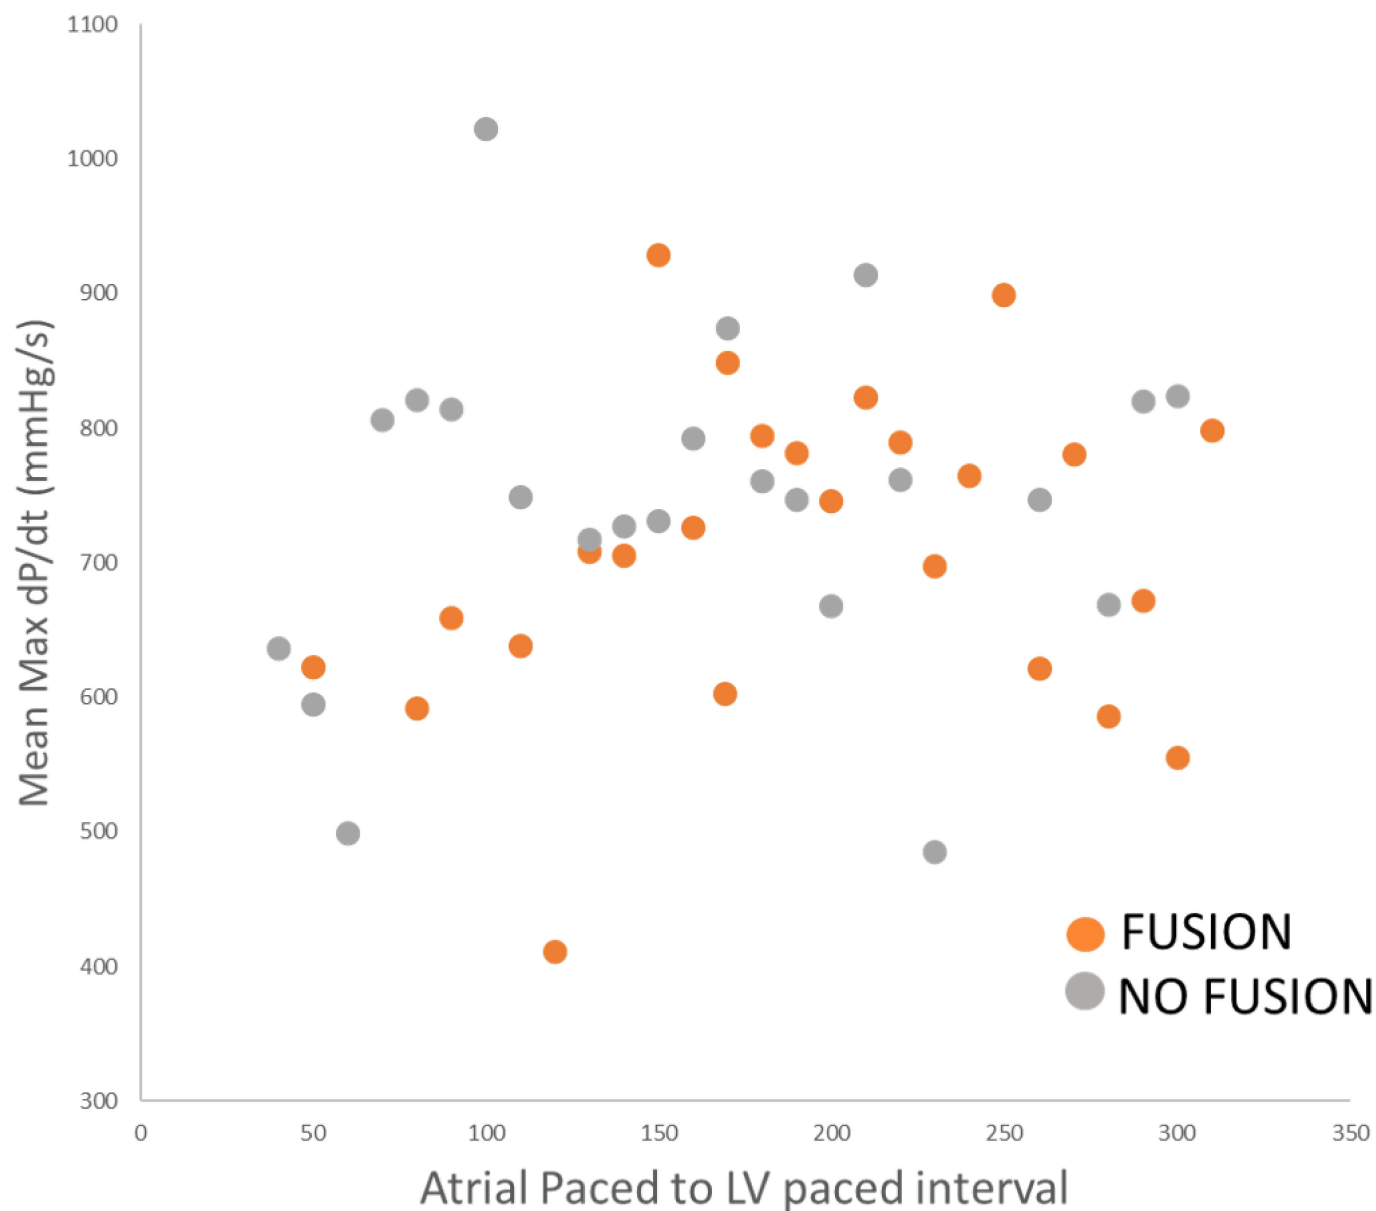

Supplement: openhrt-2021-001615supp005_data_supplement.pdf [file openhrt-2021-001615supp005_data_supplement.pdf]
