# Supplementary figures and images for: Determinants of LV dP/dtmax and QRS duration with different fusion strategies in cardiac resynchronisation therapy
Source: HighWire-hosted journal article supplement (doi:10.1136/openhrt-2021-001615), 2021-05-01

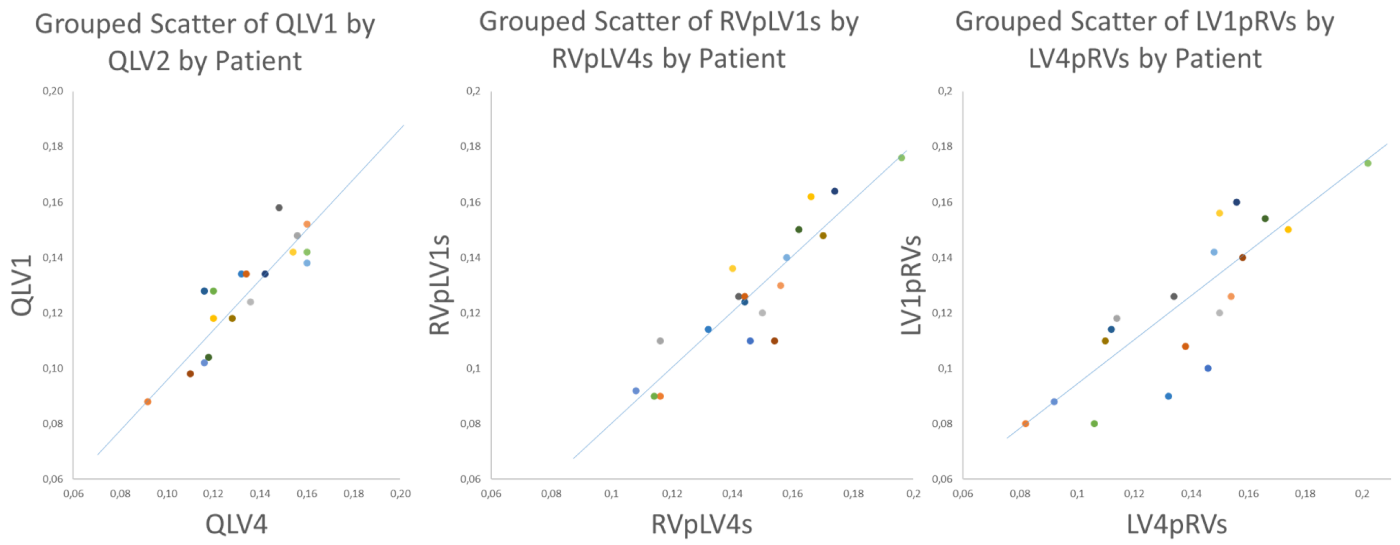

Supplement: openhrt-2021-001615supp002_data_supplement.pdf [file openhrt-2021-001615supp002_data_supplement.pdf]

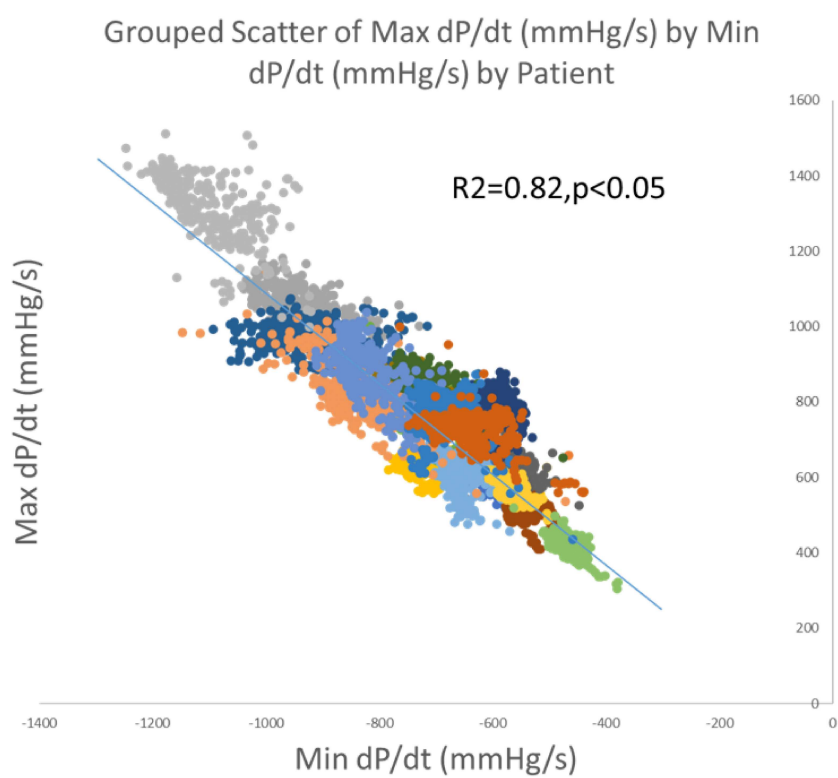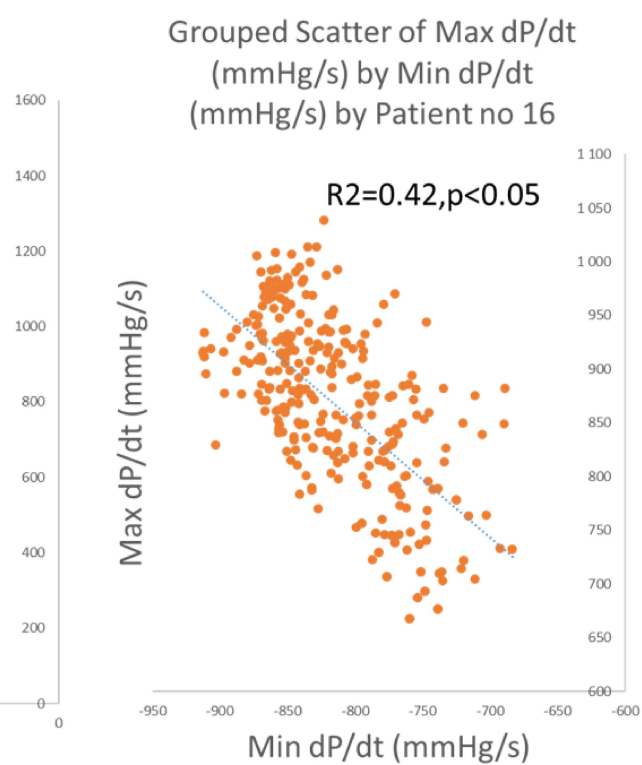

Supplement: openhrt-2021-001615supp003_data_supplement.pdf [file openhrt-2021-001615supp003_data_supplement.pdf]
